# Supplementary material for: Staphylococcus aureus Synergized with Candida albicans to Increase the Pathogenesis and Drug Resistance in Cutaneous Abscess and Peritonitis Murine Models
Source: MDPI journal article supplement (doi:10.3390/pathogens10081036), 2021-08-16
Supplement: s1 [file s1]

## *Supplementary Material*

**Table S1.** The minimum inhibitory concentration

| <b>Drugs</b>   | <b>MIC (µg/mL)</b> |                    |
|----------------|--------------------|--------------------|
|                | <i>S. aureus</i>   | <i>C. albicans</i> |
| Methicillin    | 1                  | /                  |
| Vancomycin     | 0.5                | /                  |
| Fluconazole    | /                  | 0.5                |
| Amphotericin B | /                  | 2                  |

**Table S2.** Specific primers used for RT-qPCR

| <b>Primers</b> | <b>Sequences</b>                     |
|----------------|--------------------------------------|
| 16s rRNA       | Forward: 5'-GTAGGTGGCAAGCGTTAT-3'    |
|                | Reverse: 5'-GGTG TTCCTCCATATCTCTG-3' |
| 18s rRNA       | Forward: 5'-GAGCCAGCGAGTATAAGC-3'    |
|                | Reverse: 5'-GCCTCACTAAGCCATTCAA-3'   |
| SAOUHSC_01121  | Forward: 5'-GCAGCAGATAACTTCCTTG-3'   |
|                | Reverse: 5'- TGGTAGTCATCACGAACTC-3'  |
| SAOUHSC_02708  | Forward: 5'-TGGCTCATTCAACTACTCTA-3'  |

|               |                                      |
|---------------|--------------------------------------|
|               | Reverse: 5'-GCAGATACTTGACCATTTCG-3'  |
| SAOUHSC_00192 | Forward: 5'-TGGTACAGGTATCCGTGAA-3'   |
|               | Reverse: 5'-TTCGCTTGGCTTCTTGTAT-3'   |
| SAOUHSC_00069 | Forward: 5'-CGTAACGGCTTCATCCAA-3'    |
|               | Reverse: 5'-CCAGGCTTGTTGTTGTCT-3'    |
| SAOUHSC_01705 | Forward: 5'-AAGGTGGCGACATTGTTA-3'    |
|               | Reverse: 5'-CCTCACGACCATACTCAC3'     |
| <i>glmU</i>   | Forward: 5'-TTGCGGAACGATTACAGT-3'    |
|               | Reverse: 5'-TGCCACCAATACATCATCA-3'   |
| SAOUHSC_01467 | Forward: 5'-TCTCACCAACACAATTAGCA-3'  |
|               | Reverse: 5'-TCACCATCACGAGTAACTAC-3'  |
| <i>murC</i>   | Forward: 5'-GGTGATGATGAACATCTACG-3'  |
|               | Reverse: 5'-TGTGGAGACAGGAAGTGA-3'    |
| <i>murD</i>   | Forward: 5'-CTAATCTCTGAAGCACCAATC-3' |
|               | Reverse: 5'-ATGACGACAACTCTGTAACT-3'  |
| <i>murQ</i>   | Forward: 5'-CCGTTTCAGTGCGTATTATTC-3' |
|               | Reverse: 5'-GTCTTGTTGCTTCTTCCTTAG-3' |
| <i>ERG1</i>   | Forward: 5'-GGCTGGTATCAAGGCATT-3'    |
|               | Reverse: 5'-ACTGGCTTCACTGGATTAG-3'   |
| <i>ERG3</i>   | Forward: 5'-CTTGTCACACTGTCCATCA-3'   |

Reverse: 5'-GAATCATCTGGTCTTCTGTAAG-3'

*ERG11*

Forward: 5'-TGGTGGTGGTAGACATAGA-3'

Reverse: 5'-TCTGCTGGTTCAGTAGGT-3'

*CDR1*

Forward: 5'-CAACAATACAAGACCAGCAT-3'

Reverse: 5'-ATAGAACACCGACGACAATA-3'

*CDR2*

Forward: 5'-ATGTTCTCAAGACGCTTATG-3'

Reverse: 5'-TGGATTGGTTAAGGAAGTCA-3'

---
